# Supplementary material for: ZFPM2-AS1 promotes the proliferation, migration, and invasion of human non-small cell lung cancer cells involving the JAK-STAT and AKT pathways
Source: PeerJ. 2020 Oct 26;8:e10225. doi: 10.7717/peerj.10225 (PMC7594634; doi:10.7717/peerj.10225)
Supplement: Supplemental Information 4 [file peerj-08-10225-s004.xlsx]

## Sheet: TCGA-LUAD-FPKM
ZFPM2-AS1	normal	tumor
	2	7
	3	165
	0	359
	0	192
	3	2
	1	6
	3	15
	8	55
	0	188
	5	845
	4	134
	0	76
	3	80
	9	33
	2	8
	8	117
	1	142
	7	172
	4	1341
	1	369
	2	44
	0	6
	2	189
	1	8
	3	477
	4	421
	1	6
	4	3
	2	329
	4	4
	9	6
	1	1
	3	7
	4	168
	0	7
	1	137
	9	2
	0	1
	5	225
	0	142
	4	75
	0	10
	7	6
	4	368
	1	43
	1	72
	14	577
	2	5
	2	4
	2	71
	4	64
	3	11
	11	90
	3	419
	14	70
	4	156
	5	11
	3	7
	2	370
		74
		1
		374
		329
		19
		1058
		7
		1
		102
		498
		667
		286
		8
		323
		7
		491
		87
		122
		90
		89
		4
		337
		392
		725
		43
		185
		311
		457
		280
		114
		21
		180
		205
		69
		39
		141
		421
		561
		470
		118
		425
		343
		160
		174
		901
		24
		361
		271
		115
		75
		500
		139
		18
		507
		83
		38
		15
		169
		132
		8
		28
		6
		3
		0
		22
		217
		236
		13
		193
		776
		161
		330
		6
		492
		1
		266
		268
		153
		264
		5
		289
		276
		469
		206
		85
		229
		137
		81
		11
		60
		42
		181
		299
		88
		77
		668
		4
		145
		94
		26
		12
		447
		23
		219
		20
		633
		37
		403
		197
		0
		172
		341
		1
		222
		153
		125
		97
		30
		8
		225
		96
		818
		117
		59
		41
		587
		315
		195
		66
		202
		105
		66
		65
		695
		971
		1
		59
		480
		149
		605
		2
		168
		60
		207
		9
		429
		10
		2
		94
		149
		296
		367
		28
		205
		78
		19
		124
		200
		2
		575
		257
		157
		261
		11
		1220
		95
		18
		486
		248
		270
		4
		243
		1
		235
		46
		37
		173
		12
		174
		386
		223
		175
		183
		1021
		38
		0
		325
		115
		873
		254
		350
		34
		113
		193
		502
		3
		204
		0
		51
		311
		696
		57
		2
		696
		2
		107
		358
		112
		89
		221
		3
		85
		20
		197
		328
		2
		40
		49
		27
		128
		238
		84
		241
		93
		127
		0
		90
		1682
		558
		59
		83
		171
		107
		12
		42
		463
		257
		66
		791
		161
		267
		121
		4
		4
		88
		1
		309
		234
		2
		195
		5
		57
		1078
		75
		6
		206
		34
		359
		2
		19
		428
		184
		525
		154
		111
		38
		115
		163
		68
		397
		44
		353
		205
		530
		108
		331
		24
		177
		15
		547
		858
		363
		211
		560
		177
		82
		611
		31
		121
		1
		23
		18
		274
		97
		181
		1
		920
		283
		165
		57
		0
		9
		46
		260
		4
		411
		35
		5
		1
		205
		91
		147
		96
		42
		311
		502
		15
		107
		33
		6
		475
		40
		167
		487
		2
		112
		0
		48
		59
		84
		41
		38
		2
		135
		237
		7
		467
		369
		118
		22
		0
		0
		311
		526
		298
		434
		26
		5
		262
		28
		146
		0
		194
		239
		165
		261
		1025
		242
		5
		583
		73
		291
		64
		451
		2
		20
		18
		527
		70
		148
		1
		49
		174
		411
		1240
		141
		97
		633
		24
		1
		82
		38
		501
		166
		60
		347
		33
		266
		20
		137
		82
		103
		292
		170
		0
		675
		446
		253
		79
		181
		374
		377
		8
		55
		199
		230
		25
		86
		263
		110
		128
		371
		438
		113
		5
		77
		23
		225
		32
		326
		187
		30
		491
		1
		82
		2080
		76
		249
		330
		559
		149
		9
		166
		38
		4
		1
		573
		6
		479
		324
		154
		93
		1
		516
		21
		224
		581
		278
		102
		150
		226
		14
		2
		175
		198
		493
		230
		164
		135
		3
		23
		5
		107
		157
		36
		44
		104
		439
		261
		65
		4
		157
		134
		109
		33
		178

## Sheet: TCGA-LUSC-FPKM
ZFPM2-AS1	normal	tumor
	4.34537	140.628
	12.1979	20.8169
	7.23448	170.165
	7.07892	68.3137
	7.73443	17.8214
	13.288	8.5849
	6.10604	10.6903
	0.927706	808.324
	3.22503	192.725
	5.74996	19.8713
	22.8005	5.50503
	2.36261	361.881
	3.40878	165.348
	13.5463	262.247
	7.65978	6.69987
	18.5224	24.6885
	2.92608	290.187
	7.33887	278.037
	3.85575	260.091
	8.6563	210.679
	9.05269	186.575
	10.9472	320.458
	5.08457	2.57914
	5.36274	596.274
	6.06353	116.259
	4.62678	28.9077
	5.83338	1112.19
	5.43296	297.398
	4.20341	46.0953
	24.413	110.518
	5.12052	423.969
	3.32172	81.7478
	3.03084	4.14601
	4.89919	129.865
	11.8592	431.332
	3.71779	63.2291
	3.71407	362.4
	5.22793	119.088
	4.30732	0.462584
	10.4833	363.904
	1.84994	15.9214
	4.42007	261.185
	5.52937	305.817
	5.03061	47.6914
	7.24292	528.371
	3.54069	543.839
	12.055	193.288
	7.42166	350.225
	3.97214	425.244
		10.6604
		398.041
		1036.53
		139.493
		15.7071
		6.75447
		307.272
		142.611
		558.18
		195.145
		232.51
		682.578
		19.0515
		786.362
		372.776
		89.2329
		9.43999
		356.677
		548.613
		2.17531
		239.476
		87.538
		388.711
		3.44741
		8.68336
		556.066
		872.176
		302.458
		203.469
		23.6756
		908.13
		5.0477
		21.8097
		438.893
		221.209
		32.5789
		16.815
		17.3359
		163.435
		252.342
		19.2163
		38.3221
		735.499
		317.425
		171.492
		74.5076
		313.275
		265.317
		8.95051
		271.016
		369.475
		337.333
		20.6106
		13.7316
		2.63309
		1.47616
		806.408
		119.685
		164.002
		773.412
		6.13597
		307.701
		515.852
		166.319
		15.751
		388.862
		68.9903
		297.628
		302.984
		3.11752
		0.807585
		503.057
		281.783
		375.038
		184.233
		35.9688
		5.21269
		458.698
		32.2084
		11.6196
		7.94919
		223.929
		177.077
		353.758
		328.457
		611.096
		161.02
		742.878
		1095.39
		2.70035
		500.307
		21.8067
		259.151
		377.151
		966.285
		484.64
		4.92407
		428.075
		343.936
		541.855
		261.834
		468.742
		217.136
		187.705
		557.763
		348.782
		54.2747
		235.456
		617.566
		574.687
		646.502
		57.6042
		447.305
		834.406
		2.33478
		163.497
		69.8597
		211.279
		4.35743
		218.163
		5.23152
		1585.16
		342.229
		109.653
		5.69948
		584.757
		322.408
		8.64484
		324.264
		184.608
		22.6727
		1589.88
		46.7378
		9.21692
		562.586
		105.948
		3.91289
		671.134
		947.768
		2775.9
		13.637
		6.10569
		77.6158
		18.1957
		28.2262
		2.04111
		67.0466
		330.397
		16.9298
		329.567
		49.2326
		115.223
		3.1738
		59.1883
		117.938
		957.031
		2.30938
		854.559
		102.688
		452.355
		1356.68
		59.1251
		0.395004
		695.543
		156.494
		64.3928
		503.337
		827.136
		8.23203
		360.832
		149.746
		468.567
		332.204
		68.0354
		893.666
		886.303
		5.73416
		318.087
		311.103
		11.2328
		4.35746
		147.253
		224.812
		150.452
		370.106
		184.319
		146.549
		129.782
		4.2445
		137.657
		795.129
		459.954
		9.30285
		281.755
		3.15863
		409.232
		10.6589
		5.61027
		0.0662
		4.23935
		253.762
		54.3737
		36.7948
		7.70891
		852.05
		1.80737
		2.18081
		346.417
		32.559
		42.041
		266.448
		167.348
		112.695
		1.73485
		925.022
		5.98932
		58.8428
		184.329
		136.609
		0
		148.098
		1.57483
		150.367
		101.431
		895.675
		244.387
		200.081
		259.196
		193.602
		5.92199
		1065.11
		7.57378
		9.38565
		343.339
		353.874
		15.0818
		63.9667
		97.9235
		541.826
		3.24188
		523.808
		17.6021
		8.29805
		25.5147
		277.042
		8.63573
		213.523
		3.20561
		2.08293
		8.73615
		49.4155
		0.060834
		226.047
		561.878
		44.7183
		1.89872
		376.791
		501.015
		246.315
		79.5423
		215.136
		262.387
		552.333
		1.18993
		126.062
		1014.85
		257.139
		11.5293
		510.245
		308.083
		41.757
		0.050991
		1.05359
		208.967
		7.8467
		510.414
		3.1939
		12.1074
		62.2913
		256.988
		232.403
		32.341
		233.167
		543.016
		0
		429.925
		3.59074
		816.448
		0.971053
		6.2614
		244.933
		387.307
		17.1663
		147.018
		342.989
		2.1273
		1.91062
		276.844
		178.222
		9.00927
		1.68153
		7.0553
		299.927
		1.31346
		223.567
		593.428
		54.1021
		238.829
		665.076
		490.864
		105.002
		8.86836
		570.307
		92.7496
		2.231
		2.98202
		83.0317
		651.466
		500.194
		30.4487
		736.282
		3.49352
		397.975
		30.6518
		1.32667
		452.157
		112.524
		5.01681
		6.3096
		719.778
		247.781
		490.619
		501.44
		13.4708
		714.619
		106.436
		8.795
		885.332
		715.101
		278.178
		424.914
		0.346634
		43.7714
		221.142
		530.922
		17.6898
		13.6381
		11.0352
		1752.08
		284.534
		1.56459
		2.40112
		91.645
		643.185
		9.63867
		528.573
		35.7075
		150.892
		436.509
		233.78
		4.45821
		539.249
		129.566
		373.12
		52.7379
		1.99006
		479.011
		7.46674
		4.2381
		294.89
		371.97
		782.834
		156.94
		30.6744
		800.896
		50.3844
		770.508
		3.86521
		369.576
		372.829
		445.478
		840.725
		139.514
		4.48256
		107.918
		24.0853
		1.01628
		456.682
		745.903
		597.491
		263.258
		219.456
		9.75001
		147.268
		282.825
		156.434
		298.863
		11.1623
		129.155
		10.7155
		216.793
		102.201
		380.669
		145.514
		317.515
		1.15031
		538.369
		100.948
		464.604
		337.886
		116.125
		503.305
		339.006
		1.92802
		47.7075
		11.118
		132.957
		316.262
		419.822
		134.847
		664.236
		129.5
		256.777
		1020.84
		387.757
		892.622
		710.642
		416.913
		22.9936
		227.408
		6.31183
		10.6637
		12.1146
		960.262
		4.5279
		177.899
		478.752
		10.624
		40.0874
		2.16399
		7.86091
		114.842
		61.8488
		151.193
		270.251
		218.828
		0
		199.601
		159.262
		186.612
		176.898
		426.435
		109.967
