# Supplementary material for: ZFPM2-AS1 promotes the proliferation, migration, and invasion of human non-small cell lung cancer cells involving the JAK-STAT and AKT pathways
Source: PeerJ. 2020 Oct 26;8:e10225. doi: 10.7717/peerj.10225 (PMC7594634; doi:10.7717/peerj.10225)
Supplement: Supplemental Information 5 [file peerj-08-10225-s005.xlsx]

## Sheet: fig.2A
Normal	Tumor
1	67.42
1	44.02
1	0.05
1	8.85
1	0.44
1	0.33
1	0.28
1	8.63
1	10.82
1	0.36
1	1.27
1	1.1
1	39.26
1	14.83
1	9.65
1	0.36
1	0.01
1	74.03
1	0.39
1	9.71
1	8.11
1	16.97
1	17.89
1	18.7
1	16.34
1	27.57
1	38.19
1	0.21
1	0.1
1	0.29
1	3.73
1	7.14
1	5.68
1	1.19
1	47.18
1	9.88
1	4.84
1	0.27
1	1.54
1	1.17
1	3.1
1	13.59
1	3.19
1	4.63
1	6.11
1	2.93
1	5.24
1	0.8
1	4.52
1	32

## Sheet: fig.2B
beas 2B			A549			H460			H1299			H292			HEK293
1	1	1	4.24	3.74	3.87	2.5	2.37	2.82	0.11	0.1	0.09	0.14	0.08	0.07	0.96	1.28	1.05
