# Supplementary material for: ZFPM2-AS1 promotes the proliferation, migration, and invasion of human non-small cell lung cancer cells involving the JAK-STAT and AKT pathways
Source: PeerJ. 2020 Oct 26;8:e10225. doi: 10.7717/peerj.10225 (PMC7594634; doi:10.7717/peerj.10225)
Supplement: Supplemental Information 6 [file peerj-08-10225-s006.xlsx]

## Sheet: fig.3A
si-NC			si-ZFPM2-AS1
1	1	1	0.129408	0.110338	0.0953912
1	1	1	0.0976209	0.148995	0.083235
1	1	1	0.0987552	0.0960547	0.0890031

## Sheet: fig.3B
hours	si-NC					si-ZFPM2-AS1
0	0.21	0.118	0.221	0.228	0.265	0.193	0.223	0.294	0.234	0.174
24	0.327	0.332	0.423	0.324	0.303	0.313	0.402	0.307	0.254	0.292
48	0.41	0.46	0.499	0.471	0.478	0.366	0.401	0.416	0.459	0.434
72	0.647	0.669	0.685	0.711	0.774	0.594	0.533	0.574	0.628	0.512
96	1.041	0.885	1.15	1.03	1.057	0.874	0.757	0.874	0.802	0.844
120	1.232	1.302	1.333	1.324	1.199	1.101	1.093	1.103	0.987	1.012

## Sheet: fig.3C
hours	si-NC				si-ZFPM2-AS1				si-NC+IFNγ				si-ZFPM2-AS1+IFNγ
0	0.215	0.215	0.215	0.215	0.215	0.215	0.215	0.215	0.215	0.215	0.215	0.215	0.215	0.215	0.215	0.215
24	0.258	0.277	0.249	0.276	0.282	0.253	0.25	0.259	0.268	0.276	0.282	0.278	0.305	0.296	0.298	0.288
48	0.424	0.475	0.458	0.469	0.44	0.613	0.512	0.51	0.454	0.501	0.434	0.463	0.491	0.506	0.509	0.529
72	0.688	0.863	0.829	0.702	0.616	0.576	0.56	0.654	0.975	0.796	1.097	1.101	0.727	0.956	0.663	0.677
96	1.009	1.127	0.848	0.967	0.978	0.703	1.156	0.971	1.544	1.314	1.368	1.548	0.859	0.915	1.19	1.208
120	1.023	1.216	1.203	1.396	0.901	1.298	1.131	1.107	1.896	1.747	1.803	1.799	1.137	1.245	1.222	1.361

## Sheet: fig.3D
hours	Vector				ZFPM2-AS1				Vector+IFNγ				ZFPM2-AS1+IFNγ
0	0.215	0.215	0.215	0.215	0.215	0.215	0.215	0.215	0.215	0.215	0.215	0.215	0.215	0.215	0.215	0.215
24	0.309	0.301	0.298	0.318	0.344	0.36	0.32	0.317	0.272	0.279	0.284	0.283	0.386	0.385	0.396	0.372
48	0.539	0.526	0.528	0.542	0.559	0.565	0.6	0.58	1.018	1.176	1.572	1.087	1.601	1.612	1.579	1.222
72	0.93	0.915	0.887	1.073	0.781	0.965	0.958	0.864	1.232	1.578	1.402	1.434	2.047	1.838	1.968	2.285
96	1.189	1.314	1.517	1.302	1.442	1.289	1.228	1.754	1.887	1.799	2.096	1.903	1.981	2.17	2.368	2.336
120	1.702	1.524	1.489	1.297	1.813	1.608	1.597	1.424	2.154	1.978	2.088	2.276	2.375	2.647	2.765	2.854

## Sheet: fig.3E
si-NC	si-ZFPM2-AS1			si-NC	si-ZFPM2-AS1
202	97			167	43
192	101			148	47
189	92			157	52
