# Supplementary material for: ZFPM2-AS1 promotes the proliferation, migration, and invasion of human non-small cell lung cancer cells involving the JAK-STAT and AKT pathways
Source: PeerJ. 2020 Oct 26;8:e10225. doi: 10.7717/peerj.10225 (PMC7594634; doi:10.7717/peerj.10225)
Supplement: Supplemental Information 7 [file peerj-08-10225-s007.xlsx]

## Sheet: fig.4A
si-NC	si-ZFPM2-AS1
1.012	0.582
1.012	0.495
0.988	0.704

## Sheet: fig.4B
si-NC	si-ZFPM2-AS1
1.002	0.319
1.012	0.297
0.998	0.334

## Sheet: fig.4C
	si-NC			si-ZFPM2-AS1
H460	243	218	235	101	122	131
A549	181	168	191	117	125	137

## Sheet: fig.4D
INVASION
	si-NC			si-ZFPM2-AS1
NC	114	132	119	58	71	62
IFN-γ	196	178	207	120	104	121
MIGRATION
	si-NC			si-ZFPM2-AS1
NC	84	76	88	36	34	41
IFN-γ	152	138	141	88	79	89

## Sheet: fig.4E
INVASION
	Vector			ZFPM2-AS1
NC	42	45	49	65	69	71
IFN-γ	79	83	86	135	119	121
MIGRATION
	Vector			ZFPM2-AS1
NC	35	37	31	48	54	53
IFN-γ	72	65	66	120	104	99
