# Supplementary material for: ZFPM2-AS1 promotes the proliferation, migration, and invasion of human non-small cell lung cancer cells involving the JAK-STAT and AKT pathways
Source: PeerJ. 2020 Oct 26;8:e10225. doi: 10.7717/peerj.10225 (PMC7594634; doi:10.7717/peerj.10225)
Supplement: Supplemental Information 8 [file peerj-08-10225-s008.xlsx]

## Sheet: fig.5A
	Nuclear		Cytoplasm
U1	82.4	0.1	17.6	0.3
ZFPM2-AS1	68.2	0.1	31.8	0.1
GAPDH	30.6	0	69.4	0.4

## Sheet: fig.5B
	G0-G1			S			G2-M
NC	65.4	64.51	64.47	24.53	24.97	25.16	10.07	10.53	10.37
ZFPM2-AS1	66.84	67.41	67.44	24.49	24.36	24.48	8.66	8.24	8.08
NC+γ	75.45	74.6	74.68	19.54	20.28	20.44	5.01	5.12	4.88
ZFPM2-AS1+γ	75.65	75.37	75.69	19.81	20.16	19.73	4.54	4.46	4.58

## Sheet: fig.5C
	G0-G1									S									G2-M
NC	64.42	63.52	64.32	63.6	63.29	64.04	63.05	63.68	64.59	12.4	11.58	10.34	6.74	6.14	5.51	7.79	6.43	6.48	23.18	24.91	25.35	29.66	30.57	30.45	29.16	29.89	28.93
SI	59.39	59.45	59.15	58.6	58.05	59.38	59.69	59.38	60.74	7.73	7.41	7.22	7.95	7.65	6.26	8.12	7.26	6.38	32.88	33.14	33.63	33.45	34.31	34.36	32.19	33.36	32.88
