# Supplementary material for: ZFPM2-AS1 promotes the proliferation, migration, and invasion of human non-small cell lung cancer cells involving the JAK-STAT and AKT pathways
Source: PeerJ. 2020 Oct 26;8:e10225. doi: 10.7717/peerj.10225 (PMC7594634; doi:10.7717/peerj.10225)
Supplement: Supplemental Information 10 [file peerj-08-10225-s010.xlsx]

## Sheet: fig.7A-DiffExp
Tumor	Nor	p
BLCA.Tumor	BLCA.Normal	3.28283e-08
BRCA.Tumor	BRCA.Normal	2.6923e-24
CHOL.Tumor	CHOL.Normal	0.00176777
COAD.Tumor	COAD.Normal	2.10801e-15
ESCA.Tumor	ESCA.Normal	0.00709788
HNSC-HPVpos.Tumor	HNSC-HPVneg.Tumor	0.00327985
HNSC.Tumor	HNSC.Normal	0.0556286
KICH.Tumor	KICH.Normal	0.034718
KIRC.Tumor	KIRC.Normal	0.0337516
KIRP.Tumor	KIRP.Normal	8.17202e-08
LIHC.Tumor	LIHC.Normal	2.25818e-20
LUAD.Tumor	LUAD.Normal	3.75527e-19
LUSC.Tumor	LUSC.Normal	3.88725e-24
PRAD.Tumor	PRAD.Normal	2.03604e-13
READ.Tumor	READ.Normal	2.51676e-06
SKCM.Tumor	SKCM.Metastasis	3.99164e-19
STAD.Tumor	STAD.Normal	0.000430994
THCA.Tumor	THCA.Normal	6.24394e-30
UCEC.Tumor	UCEC.Normal	1.07943e-22

## Sheet: fig.7B-Survival
cancer	variable	p
LUAD	B Cell	0.000268218
LUAD	CD8+ T Cell	0.345905
LUAD	CD4+ T Cell	0.507773
LUAD	Macrophage	0.110109
LUAD	Neutrophil	0.0810688
LUAD	Dendritic Cell	0.0475236
LUAD	ZFPM2	0.914802
